# Supplementary material for: Cytotoxic Effects of Sarcophyton sp. Soft Corals—Is There a Correlation to Their NMR Fingerprints?
Source: PubMed Central journal article supplement (PMC5532653; doi:10.3390/md15070211), 2017-07-04
Supplement: marinedrugs-15-00211-s001.pdf [file marinedrugs-15-00211-s001.pdf]

**Supplementary Materials:****Suppl. Table S1** *Sarcophyton*, *Sinularia*, and *Lobophyton* soft corals origin used in this study

| Accession | Species                             | Original Source              | Depth     |
|-----------|-------------------------------------|------------------------------|-----------|
| SA        | <i>Sarcophyton acutum</i>           | Northern Hurghada (Al-Guna)  | 3 m       |
| SC1       | <i>Sarcophyton convolutum</i>       | Northern Hurghada (Al-Guna)  | 2 m       |
| SC2       | <i>Sarcophyton convolutum</i>       | Northern Safaga (Makadi bay) | Reef flat |
| SE1       | <i>Sarcophyton ehrenbergi</i>       | Northern Hurghada (Al-Guna)  | Reef flat |
| SE2       | <i>Sarcophyton ehrenbergi</i>       | Northern Safaga (Makadi bay) | 2 m       |
| SE3       | <i>Sarcophyton ehrenbergi</i>       | Northern Safaga (Makadi bay) | 3 m       |
| SE4       | <i>Sarcophyton ehrenbergi</i>       | Aquarium, ZMT, Germany       | -         |
| SG1       | <i>Sarcophyton glaucum</i>          | Northern Hurghada (Al-Guna)  | Reef flat |
| SG2       | <i>Sarcophyton glaucum</i>          | Northern Safaga (Makadi bay) | Reef flat |
| SG3       | <i>Sarcophyton glaucum</i>          | Aquarium, ZMT, Germany       | -         |
| SR1       | <i>Sarcophyton regulare</i>         | Northern Hurghada (Al-Guna)  | 3m        |
| SR2       | <i>Sarcophyton regulare</i>         | Northern Safaga (Makadi bay) | 3 m       |
| SR3       | <i>Sarcophyton regulare</i>         | Northern Safaga (Makadi bay) | 2 m       |
| S         | Unidentified <i>Sarcophyton</i> sp. | Northern Safaga (Makadi bay) | 5 m       |
| LP        | <i>Lobophyton pauciliforum</i>      | Northern Safaga (Makadi bay) | 3 m       |
| SP        | <i>Sinularia polydactela</i>        | Northern Safaga (Makadi bay) | 2 m       |

**Suppl. Table S2.** List of 1H chemical shifts used for metabolite identification and quantification. Chemical shifts were determined in acetone-D6 and expressed as relative values to HMDS (0.94 mM final concentration). Chemical groups were characterized as previously described[18].

| Metabolite                                                                                        | Signal | Number of protons | <sup>1</sup> H (ppm) |
|---------------------------------------------------------------------------------------------------|--------|-------------------|----------------------|
| <b>Guaiacophine (N1)</b><br>CID: 11206744                                                         | H3-14  | 3                 | 1.13                 |
| <b>Sarcophine/ent-Sarcophine (N2/3)</b><br>CID: 6436805 /101472593                                | H-7    | 1                 | 2.63                 |
| <b>7<math>\alpha</math>,8<math>\beta</math>-Dihydroxy deepoxysarcophine (N4)</b><br>CID: 10806655 | H-7    | 1                 | 3.44                 |
| <b>7<math>\beta</math>,8<math>\beta</math>-Dhydroxydeepoxysarcophine (N5)</b>                     | H-7    | 1                 | 3.55                 |
| <b>Gorgosterol (N6)</b><br>CID: 100068                                                            | H3-30a | 1                 | 0.48                 |

**Supplementary Figure S1**

Preference for utilizing signals of methyl groups for gorgosterol (N6) quantification in coral extracts.

A) <sup>1</sup>H NMR spectrum of *S. convolutum* extract (SC1), coral which is rich in gorgosterol, all signals are sharp and well demarcated from noise. B) <sup>1</sup>H NMR spectrum of *L. pauciliforum* extract (LP), coral with intermediate gorgosterol levels, with only H<sub>3</sub>-27 signal is demarcated from noise despite of its less integration. C) <sup>1</sup>H NMR spectrum of *S. polydactela* extract (SP), in which gorgosterol is found at trace levels.

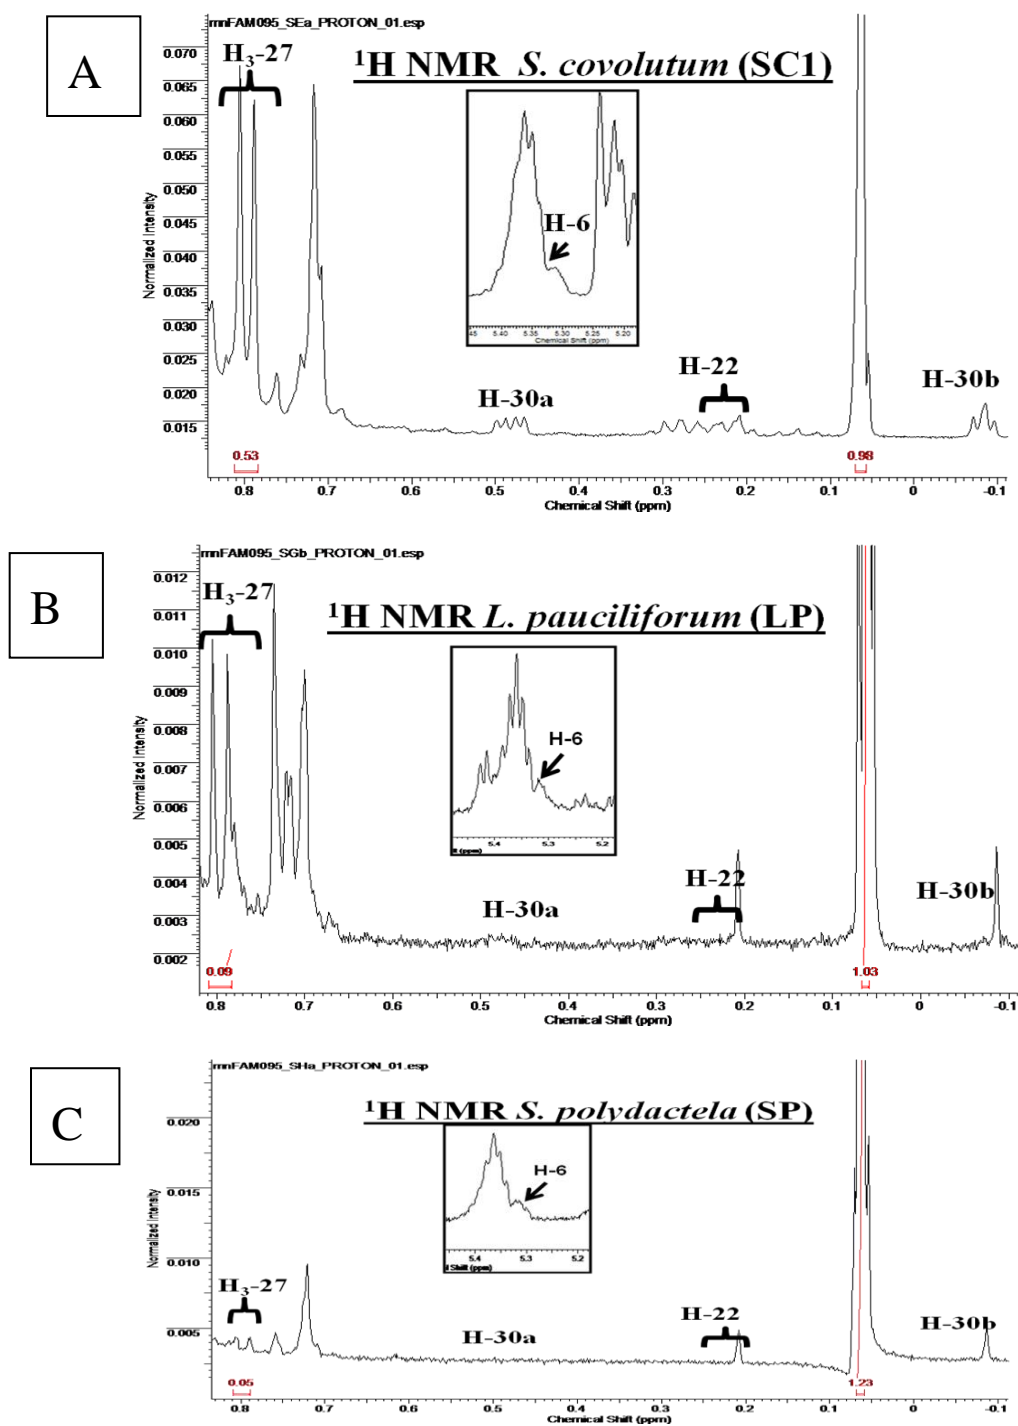

### Supplementary Figure S2

PCA analysis showing clustering of reef flat corals (green) on the positive upper quadrant side of PC1 compared to the sporadic scattering of the 2–3 m sea depth collected corals (yellow)

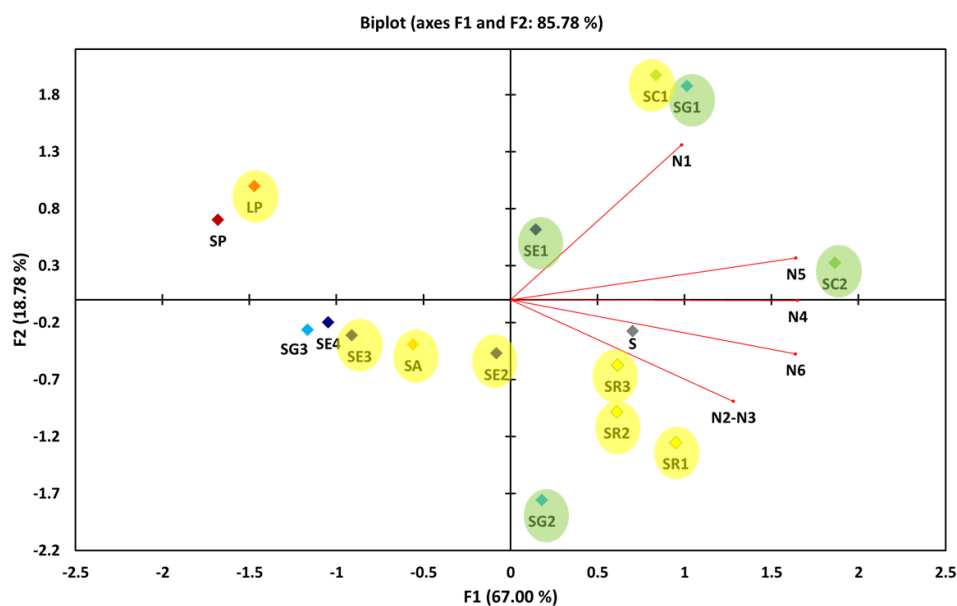

Suppl. Table S3. Quantification of N1-N6 metabolite levels in soft coral species. Different letters in parenthesis indicate significant differences between soft coral specimens according to least significant difference analysis (LSD).

|     | N1                     | N2-N3                   | N4                       | N5                        | N6                       |
|-----|------------------------|-------------------------|--------------------------|---------------------------|--------------------------|
| SA  | nd                     | 25.7±2.9 <sup>d</sup>   | 13.7±0.4 <sup>cdef</sup> | 15.2± 1.8 <sup>cdef</sup> | 14.4± 1.7 <sup>bcd</sup> |
| SC1 | 9.8±3.5 <sup>b</sup>   | 28.4±6.3 <sup>d</sup>   | 25.6± 6.2 <sup>abc</sup> | 32.9± 8.9 <sup>ab</sup>   | 16.1± 2.9 <sup>bcd</sup> |
| SC2 | 10.2±4.8 <sup>a</sup>  | 106.9±18.5 <sup>a</sup> | 27.8±2.4 <sup>ab</sup>   | 33.8±1.2 <sup>a</sup>     | 25.1±1 <sup>a</sup>      |
| SE1 | 3.6±0.5 <sup>c</sup>   | 27.6±4.1 <sup>d</sup>   | 16.1±1.7 <sup>cdef</sup> | 30.7±3.3 <sup>ab</sup>    | 15.5±1.3 <sup>bcd</sup>  |
| SE2 | nd                     | 35.7±2.5 <sup>cd</sup>  | 19.7±1.7 <sup>cde</sup>  | 21.6±1.9 <sup>bcd</sup>   | 15.2±0.8 <sup>bcd</sup>  |
| SE3 | nd                     | 17.8±1.3 <sup>de</sup>  | 10.4±0.8 <sup>def</sup>  | 10.2±1 <sup>def</sup>     | 13.2±1.3 <sup>cde</sup>  |
| SE4 | 2.0±0.2 <sup>cd</sup>  | 32.9±2.3 <sup>d</sup>   | 7.0±4.8 <sup>f</sup>     | 4.6±3.1 <sup>f</sup>      | 11.6±2.7 <sup>de</sup>   |
| SG1 | 10.5±0.7 <sup>ab</sup> | 27.2±0.4 <sup>d</sup>   | 22.5±3.5 <sup>bcd</sup>  | 33.1±7 <sup>ab</sup>      | 22.5±1 <sup>ab</sup>     |
| SG2 | nd                     | 94.3±5.8 <sup>bc</sup>  | 15.2±0 <sup>cd</sup>     | 16.2±1.4 <sup>cde</sup>   | 18.8±7.1 <sup>abcd</sup> |
| SG3 | nd                     | 16.8±0.3 <sup>de</sup>  | 7.5±0.8 <sup>ef</sup>    | 7.6±1.6 <sup>ef</sup>     | 11.2±1.9 <sup>de</sup>   |
| SR1 | nd                     | 66.3±17 <sup>b</sup>    | 23.5±6.6 <sup>bc</sup>   | 31.1±14.5 <sup>ab</sup>   | 26.0±10.6 <sup>a</sup>   |
| SR2 | nd                     | 59.3±3.8 <sup>bc</sup>  | 25.6±3.4 <sup>abc</sup>  | 26.5±4.1 <sup>bc</sup>    | 20.0±2.7 <sup>abc</sup>  |
| SR3 | 4.0±0.5 <sup>c</sup>   | 74.8±12.9 <sup>b</sup>  | 20.3±2.5 <sup>cd</sup>   | 20.8±4.4 <sup>bcd</sup>   | 21.4±7.2 <sup>abc</sup>  |
| S   | 1.8±4.5 <sup>d</sup>   | 28.3±5.2 <sup>d</sup>   | 31.0±17.8 <sup>a</sup>   | 22.9±12.8 <sup>bc</sup>   | 23.5±10.8 <sup>a</sup>   |
| LP  | 3.7±2.4 <sup>c</sup>   | 0.8±1.6 <sup>e</sup>    | 5.5±1.7 <sup>f</sup>     | 5.5±2.3 <sup>ef</sup>     | 5.5±1.5 <sup>ef</sup>    |
| SP  | 0.9±0.7 <sup>d</sup>   | nd                      | 7.5±4.3 <sup>ef</sup>    | 7.9±6.2 <sup>ef</sup>     | nd                       |
